# Supplementary material
Source: ML conference proceedings conference paper supplement (https://openaccess.thecvf.com/content/CVPR2025/html/Lu_Improving_Semi-Supervised_Semantic_CVPR_2025_paper.html)
Supplement: Supplementary file 1 [file Lu_Improving_Semi-Supervised_Semantic_CVPR_2025_supplemental.pdf]

# Improving Semi-Supervised Semantic Segmentation with Sliced-Wasserstein Feature Alignment and Uniformity

## Supplementary Material

### Proof: Uniform Distribution of Normalized Gaussian Vectors

Let  $\mathbf{X} = (X_1, X_2, \dots, X_n)$  be an  $n$ -dimensional random vector where each  $X_i \stackrel{iid}{\sim} N(0, 1)$ . Then the normalized vector

$$\mathbf{Y} = \frac{\mathbf{X}}{\|\mathbf{X}\|}$$

is uniformly distributed over the unit hypersphere  $S^{n-1}$  in  $\mathbb{R}^n$ .

*Proof.* We proceed in several steps to show that  $\mathbf{Y}$  inherits a uniform distribution from the spherical symmetry of the multivariate normal distribution.

**Joint Distribution of  $\mathbf{X}$**  Since the components of  $\mathbf{X}$  are independent standard normal variables, their joint probability density function is:

$$f_{\mathbf{X}}(\mathbf{x}) = \prod_{i=1}^n \frac{1}{\sqrt{2\pi}} e^{-x_i^2/2} = \left( \frac{1}{\sqrt{2\pi}} \right)^n \exp\left(-\frac{\|\mathbf{x}\|^2}{2}\right)$$

where  $\|\mathbf{x}\|^2 = \sum_{i=1}^n x_i^2$ . Crucially, this density depends only on  $\|\mathbf{x}\|$ , indicating spherical symmetry.

**Spherical Coordinate Transformation** We transform to  $n$ -dimensional spherical coordinates. The volume element in these coordinates is:

$$dV = r^{n-1} dr d\Omega$$

where:

- $r = \|\mathbf{x}\|$  is the radial coordinate
- $d\Omega$  is the surface element on the unit sphere  $S^{n-1}$

**Distribution in Spherical Coordinates** In spherical coordinates, the joint density becomes:

$$f_{\mathbf{X}}(r, \Omega) = \left( \frac{1}{\sqrt{2\pi}} \right)^n \exp\left(-\frac{r^2}{2}\right)$$

This expression can be factored as:

$$f_{\mathbf{X}}(r, \Omega) = f_r(r) \cdot f_{\Omega}(\Omega)$$

where:

$$f_r(r) = C_n \cdot r^{n-1} \exp\left(-\frac{r^2}{2}\right)$$

and  $f_{\Omega}(\Omega)$  is constant over the sphere. Here,  $C_n$  is a normalizing constant.

**Independence and Uniformity** Two key observations follow:

- The radial component  $r$  and the angular components  $\Omega$  are independent, as evidenced by the factorization.
- The angular density  $f_{\Omega}(\Omega)$  is constant, implying a uniform distribution over  $S^{n-1}$ .

**Distribution of  $\mathbf{Y}$**  The normalized vector  $\mathbf{Y} = \mathbf{X}/\|\mathbf{X}\|$  depends only on the angular components:

$$\mathbf{Y} = (\cos \theta_1, \sin \theta_1 \cos \theta_2, \dots, \prod_{k=1}^{n-2} \sin \theta_k \cos \theta_{n-1}, \prod_{k=1}^{n-1} \sin \theta_k)$$

Since the angular components are uniformly distributed on  $S^{n-1}$ , so is  $\mathbf{Y}$ .  $\square$
